# Supplementary material
Source: HighWire-hosted journal article supplement (https://jnm.snmjournals.org/highwire/filestream/94948/field_highwire_adjunct_files/0/169870_Supplemental_Data.pdf)
Supplement: 169870_Supplemental_Data.pdf [file 169870_Supplemental_Data.pdf]

**Supplemental Table 1.** Clinical, echocardiographic and positron emission tomography characteristics of all amyloid and hypertensive control subjects.

| Variable                                                       | Hypertensive control (n=4) | All amyloid patients (n=10) | *p value between 2 groups | AL subtype (n=5)         | ATTR subtype (n=5)       | †p value between 3 groups |
|----------------------------------------------------------------|----------------------------|-----------------------------|---------------------------|--------------------------|--------------------------|---------------------------|
| Age (years)                                                    | 61.3±4.3                   | 67.9±8.9                    | 0.26                      | 63.2±6.3                 | 72.6±9.2                 | 0.13                      |
| Male sex (%)                                                   | 75.0                       | 90.0                        | 0.51                      | 80.0                     | 100                      | >0.99                     |
| Body surface area (m <sup>2</sup> )                            | 2.07±0.27                  | 1.98±0.11                   | 0.26                      | 2.00±0.13                | 1.96±0.11                | 0.42                      |
| Body mass index (kg/m <sup>2</sup> )                           | 32.0±4.6                   | 27.4±3.5                    | 0.16                      | 28.6±3.5                 | 26.1±3.3                 | 0.26                      |
| Systolic blood pressure (mmHg)                                 | 178±40                     | 128±24                      | 0.047                     | 130±32                   | 125±17                   | 0.14                      |
| Diastolic blood pressure (mmHg)                                | 96±13                      | 78±12                       | 0.034                     | 81±9                     | 76±7                     | 0.11                      |
| Heart rate (beats/min)                                         | 65±17                      | 70±15                       | 0.72                      | 82±9                     | 59±11                    | 0.08                      |
| GFR (mL/min/1.73 m <sup>2</sup> )                              | 96±21                      | 60±25                       | 0.023                     | 65±31                    | 55±21                    | 0.07                      |
| Cardiac troponin I (μg/L)                                      | 0.019±0.003                | 0.075±0.080                 | 0.07                      | 0.043±0.035              | 0.107±0.103              | 0.06                      |
| BNP (ng/L)                                                     | <50                        | 531±548                     | —                         | 357±364                  | 705±683                  | —                         |
| Interventricular septal wall thickness (mm)                    | 14.0±1.3                   | 16.9±2.0                    | 0.024                     | 16.5±2.7                 | 17.3±1.1                 | 0.06                      |
| Posterior wall thickness (mm)                                  | 12.6±1.8                   | 16.0±2.0                    | 0.024                     | 15.5±2.4                 | 16.4±1.6                 | 0.07                      |
| Relative wall thickness                                        | 0.52±0.07                  | 0.81±0.18                   | 0.006                     | 0.76±0.17 <sup>‡</sup>   | 0.86±0.19 <sup>‡</sup>   | 0.020                     |
| LV mass index (g/m <sup>2</sup> )                              | 130±32                     | 141±33                      | 0.57                      | 139±34                   | 143±37                   | 0.85                      |
| LVEDVI (mL/m <sup>2</sup> )                                    | 60.0±7.5                   | 56.4±15.4                   | 0.40                      | 54.6±9.2                 | 58.1±20.9                | 0.70                      |
| LVESVI (mL/m <sup>2</sup> )                                    | 23.7±5.4                   | 28.3±12.0                   | 0.57                      | 25.8±5.7                 | 30.8±16.5                | 0.60                      |
| LVEF (%)                                                       | 60.8±4.6                   | 50.6±10.2                   | 0.07                      | 51.8±12.2                | 49.5±9.0                 | 0.17                      |
| Stroke volume index (mL/m <sup>2</sup> )                       | 41.7±7.1                   | 25.3±6.9                    | 0.011                     | 25.0±8.3                 | 25.5±6.1                 | 0.036                     |
| Cardiac index (L/min/m <sup>2</sup> )                          | 2.7±0.8                    | 1.7±0.5                     | 0.024                     | 2.0±0.5                  | 1.46±0.24 <sup>‡</sup>   | 0.022                     |
| Transmitral E wave (m/s)                                       | 0.52±0.05                  | 0.82±0.26                   | 0.007                     | 0.94±0.33 <sup>‡</sup>   | 0.70±0.10                | 0.021                     |
| Transmitral E/A ratio                                          | 0.80±0.10                  | 2.66±1.92                   | 0.031                     | 2.36±1.56                | 3.03±2.50                | 0.08                      |
| Transmitral deceleration time (ms)                             | 280±40                     | 178±58                      | 0.011                     | 175±64                   | 181±59                   | 0.035                     |
| Mitral annular s' velocity (cm/s)                              | 7.3±1.7                    | 4.7±1.5                     | 0.028                     | 5.4±1.4                  | 4.0±1.3                  | 0.034                     |
| Mitral annular e' velocity (cm/s)                              | 5.7±0.3                    | 4.5±1.2                     | 0.06                      | 4.8±0.8                  | 4.2±1.5                  | 0.15                      |
| Mitral E/e' ratio                                              | 9.4±1.2                    | 19.0±5.9                    | 0.005                     | 19.6±5.5 <sup>‡</sup>    | 18.4±6.8 <sup>‡</sup>    | 0.017                     |
| RV free wall thickness (mm)                                    | 5.5±0.7                    | 10.5±3.0                    | 0.007                     | 8.7±1.9                  | 12.3±2.9 <sup>‡</sup>    | 0.008                     |
| RV end-diastolic area (cm <sup>2</sup> )                       | 25.9±1.2                   | 21.4±3.3                    | 0.024                     | 21.4±3.9                 | 21.5±2.9                 | 0.08                      |
| RV end-systolic area (cm <sup>2</sup> )                        | 14.0±0.9                   | 12.7±3.2                    | 0.48                      | 12.8±3.8                 | 12.5±3.0                 | 0.78                      |
| RV fractional area change (%)                                  | 45.9±2.7                   | 41.6±8.3                    | 0.48                      | 40.9±9.3                 | 42.3±8.2                 | 0.77                      |
| Tricuspid annular s' velocity (cm/s)                           | 13.5±2.3                   | 8.0±2.7                     | 0.016                     | 8.1±2.3                  | 8.0±3.3                  | 0.054                     |
| LV global longitudinal strain (%)                              | -17.4±1.4                  | -9.5±2.1                    | 0.005                     | -9.8±2.7 <sup>‡</sup>    | -9.1±1.5 <sup>‡</sup>    | 0.018                     |
| RV free wall longitudinal strain (%)                           | -25.3±4.5                  | -14.8±4.0                   | 0.007                     | -16.5±7.8                | -14.6±3.3 <sup>‡</sup>   | 0.027                     |
| SUV <sub>0-5</sub>                                             | 3.99±0.79                  | 4.31±1.20                   | 0.89                      | 4.89±1.43                | 3.73±0.56                | 0.39                      |
| SUV <sub>15-20</sub>                                           | 1.15±0.16                  | 3.39±1.36                   | 0.005                     | 4.09±1.66 <sup>‡</sup>   | 2.68±0.37 <sup>‡</sup>   | 0.010                     |
| Myocardial <sup>18</sup> F-florbetaben RI (min <sup>-1</sup> ) | 0.011±0.003                | 0.040±0.013                 | 0.005                     | 0.046±0.014 <sup>‡</sup> | 0.033±0.008 <sup>‡</sup> | 0.011                     |
| Percentage myocardial <sup>18</sup> F-florbetaben retention    | 29.4±4.5                   | 83.1±38.2                   | 0.005                     | 92.2±51.9 <sup>‡</sup>   | 74.0±19.7 <sup>‡</sup>   | 0.018                     |

\*p value between all amyloid patients and hypertensive control by Mann-Whitney *U* test for continuous data.

†p value between AL amyloid, ATTR amyloid and hypertensive control by Kruskal Wallis test for continuous data, and exact-chi square test for categorical data.

‡p value <0.05 versus hypertensive controls with Bonferroni correction.

BNP: B-type natriuretic peptide; EDVI: end-diastolic volume index; ESVI: end-systolic volume index; EF: ejection fraction; GFR: glomerular filtration rate; LV: left ventricular; RV: right ventricular; SUV<sub>0-5</sub>: LV myocardial standardized uptake value between 0 and 5 min; SUV<sub>15-20</sub>: LV myocardial standardized uptake value between 15 and 20 min; RI: retention index.

**Supplemental Table 2.** Multiple linear regression models for left ventricular global longitudinal strain and right ventricular free wall longitudinal strain

| Variable                                                             | <u>Univariable</u>   |         | <u>Multivariable</u> |         |
|----------------------------------------------------------------------|----------------------|---------|----------------------|---------|
|                                                                      | Standardized $\beta$ | p value | Standardized $\beta$ | p value |
| <b><u>LV global longitudinal strain*</u></b>                         |                      |         |                      |         |
| Systolic blood pressure                                              | -0.677               | 0.008   |                      |         |
| Diastolic blood pressure                                             | -0.672               | 0.009   |                      |         |
| Interventricular septal wall thickness                               | 0.550                | 0.042   |                      |         |
| Posterior wall thickness                                             | 0.628                | 0.016   | 0.206                | 0.15    |
| Inverse percentage myocardial $^{18}\text{F}$ -florbetaben retention | -0.912               | <0.001  | -0.804               | <0.001  |
| <b><u>RV free wall longitudinal strain*</u></b>                      |                      |         |                      |         |
| RV free wall thickness                                               | 0.693                | 0.006   | 0.290                | 0.23    |
| Interventricular septal wall thickness                               | 0.536                | 0.048   |                      |         |
| Inverse percentage myocardial $^{18}\text{F}$ -florbetaben retention | -0.800               | 0.001   | -0.607               | 0.021   |

\*Only posterior wall thickness and inverse percentage myocardial  $^{18}\text{F}$ -florbetaben retention were entered into the multivariable because of significant colinearities between the univariable predictors.

LV: left ventricular; RV: right ventricular.

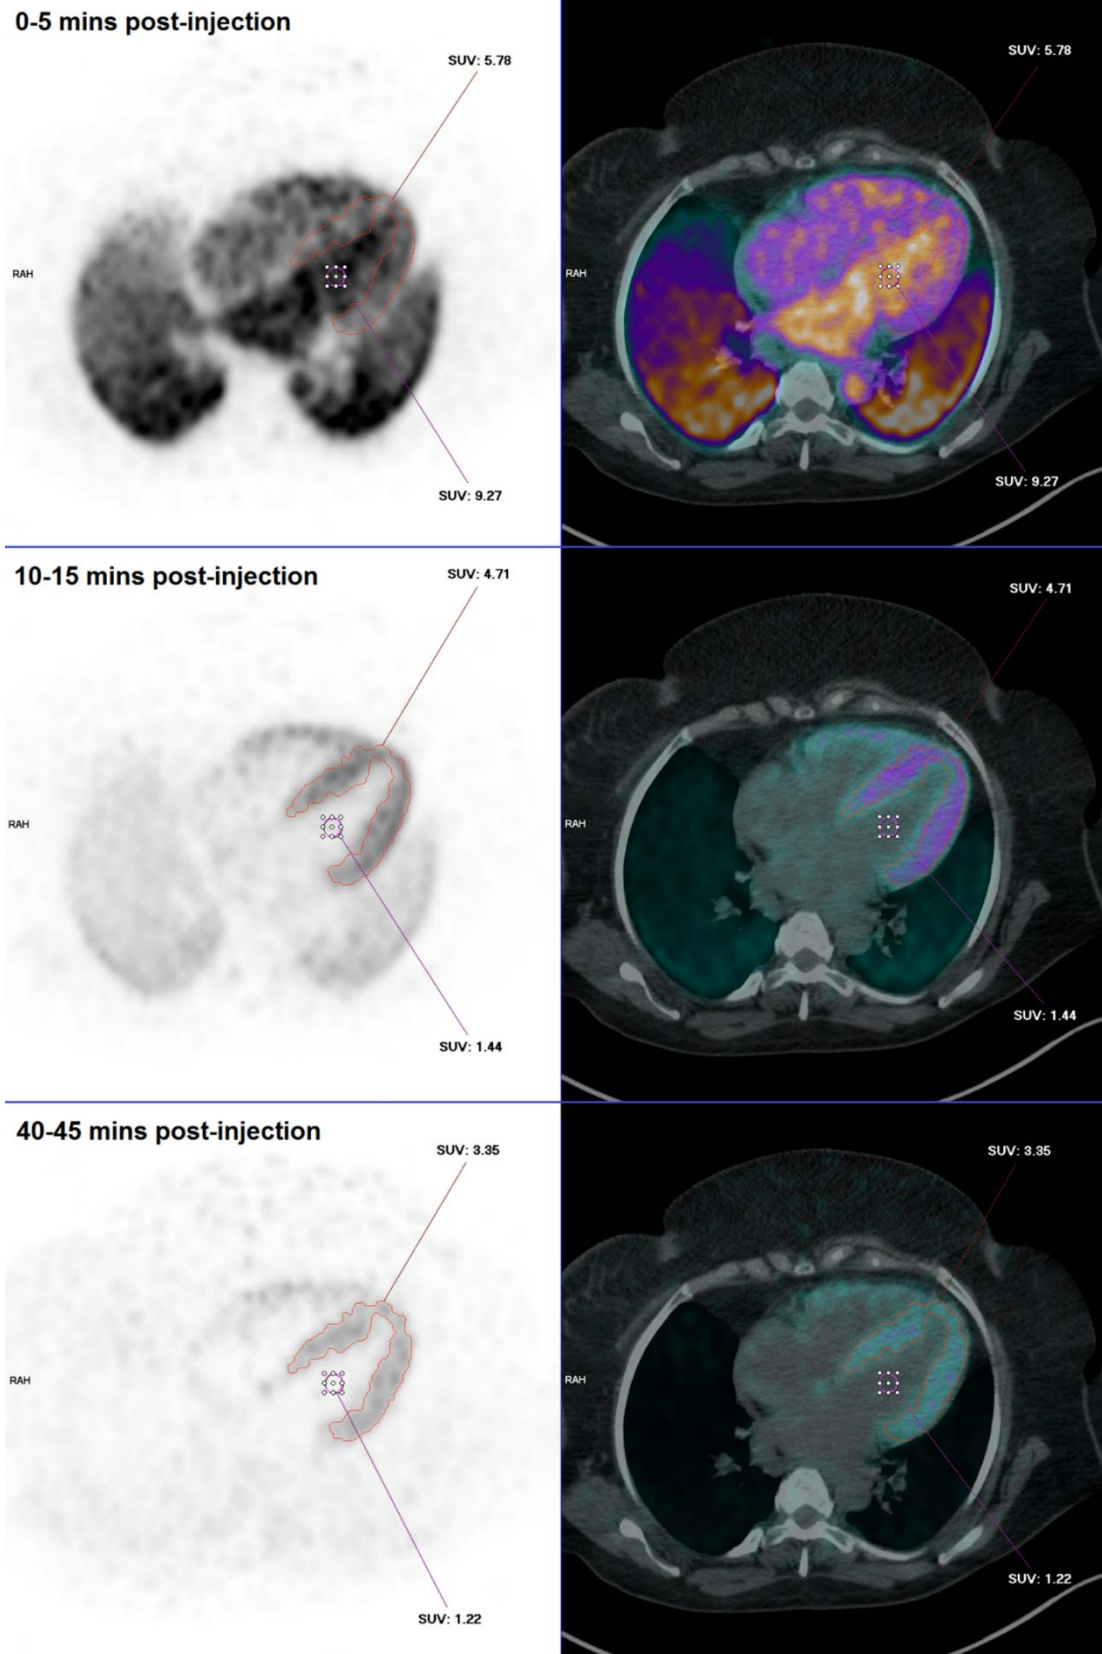

**Supplemental Figure 1.** Transposition of the obtained myocardial contour to the remainder of the frames for dynamic analysis.
